# Supplementary material
Source: PubMed Central journal article supplement (PMC4177304)
Supplement: NIHMS622952-supplement-Supp_TableS1_revised.pdf [file NIHMS622952-supplement-Supp_TableS1_revised.pdf]

**Supp.Table S1: CASQ1 intragenic SNPs analysis**

| SNP                | Family 1 |      |          | Family 2 |     |          | Family 3 |       |          | Family 4 |     |          | Sporadic | HAPL     |
|--------------------|----------|------|----------|----------|-----|----------|----------|-------|----------|----------|-----|----------|----------|----------|
|                    | III:5    | II:4 | HAPL     | II:1     | I:1 | HAPL     | II:3     | III:2 | HAPL     | II:2     | I:1 | HAPL     |          |          |
| rs617698           | G/G      | A/G  | <b>G</b> | A/G      | G/G | <b>G</b> | G/G      | A/G   | <b>G</b> | A/G      | G/G | <b>G</b> | G/G      | <b>G</b> |
| rs61803844         | G/G      | G/G  | <b>G</b> | A/G      | G/G | <b>G</b> | G/G      | G/G   | <b>G</b> | A/G      | G/G | <b>G</b> | A/G      | <b>?</b> |
| rs617599           | A/A      | A/G  | <b>A</b> | A/G      | A/A | <b>A</b> | A/G      | A/G   | <b>?</b> | A/G      | A/A | <b>A</b> | A/A      | <b>A</b> |
| rs3747621          | T/T      | T/C  | <b>T</b> | T/T      | T/T | <b>T</b> | T/C      | T/C   | <b>?</b> | T/T      | T/T | <b>T</b> | T/C      | <b>?</b> |
| rs3747622          | G/G      | G/G  | <b>G</b> | G/C      | G/G | <b>G</b> | G/G      | G/G   | <b>G</b> | G/C      | G/G | <b>G</b> | G/C      | <b>?</b> |
| rs3747623          | T/T      | T/C  | <b>T</b> | T/C      | T/T | <b>T</b> | T/C      | T/C   | <b>?</b> | T/C      | T/T | <b>T</b> | C/C      | <b>C</b> |
| <b>c.731A&gt;G</b> | +/-      | +/-  | <b>+</b> | +/-      | +/- | <b>+</b> | +/-      | -/-   | <b>+</b> | +/-      | +/- | <b>+</b> | +/-      | <b>+</b> |
| rs822450           | A/G      | A/G  | <b>?</b> | A/G      | A/A | <b>A</b> | A/G      | A/G   | <b>?</b> | A/G      | A/A | <b>A</b> | G/G      | <b>G</b> |

+/- = individuals heterozygous for the c.731A>G variant; -/- = individuals homozygous for the wild type allele; HAPL = Haplotype phased with the c.731A>G variant. Question marks indicate heterozygous SNPs in both individuals in a family. The differences between haplotypes are highlighted in red and blue.
